# Supplementary material
Source: Springer Nature journal article supplement (https://www.springermedizin.de/resource/supplementary/12874_2012_888_MOESM3_ESM.pdf/9432716)
Supplement: MOESM3 [file 9432716]

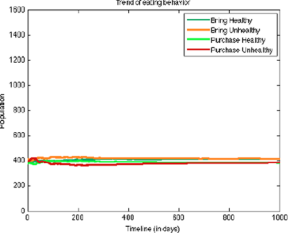

(a) Healthy eating behaviour parameters are equal

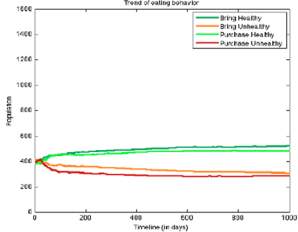

(b) 10% increase in healthy eating parameter

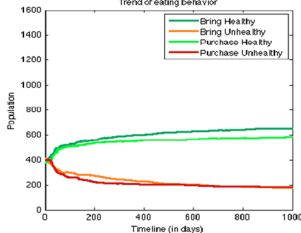

(c) Further increase (10%) in healthy eating parameter
